# Supplementary material for: Anticancer Potential of Natural Chalcones: In Vitro and In Vivo Evidence
Source: MDPI journal article supplement (doi:10.3390/ijms241210354), 2023-06-19
Supplement: s1 [file s1]

**Table S1.** Antiproliferative and anticancer effects of xanthohumol and butein based on *in vitro/in vivo* studies.

| Chalcones                                                                         | Type of cancer | Mechanism of action/target or/and downstream effector                                                                                                                                                                                                                                                                                                                                                                                                                                                                             | References              |
|-----------------------------------------------------------------------------------|----------------|-----------------------------------------------------------------------------------------------------------------------------------------------------------------------------------------------------------------------------------------------------------------------------------------------------------------------------------------------------------------------------------------------------------------------------------------------------------------------------------------------------------------------------------|-------------------------|
| 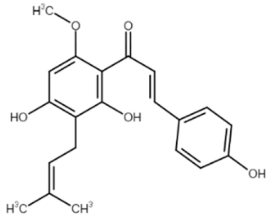 | Breast         | In vitro: inhibition of proliferation, migration, colony and sphere formation<br>↓ mitochondrial function, ↓ ROS production, ↑ population of sub G0/G1 cells, induction of apoptosis, ↓ expression of Bcl-2, MMP-9, MDR1, EGFR, STAT3, ↑ expression of DR4 and DR5, sensitization of MCF-7/ADR cells, PI3K, HER2 and Ser/Thr kinase receptors binding activity<br>In vivo: antiangiogenic effect, ↓ expression of factor VIII, phospho- IκBα, IL-1b, Ki-67, Notch 1, activity of NFκB,<br>↓ activation of Notch signaling pathway | [24-26,28,29,31,32,345] |
|                                                                                   | Liver          | In vitro: induction of apoptosis, inhibition of cell proliferation, migration and clonogenicity<br>↓ Notch1, HES-1, Notch signaling pathway, NF-κB<br>↑ caspase-3 activation, p53<br>In vivo: reduction the number of liver preneoplastic lesions                                                                                                                                                                                                                                                                                 | [90-93,95]              |
|                                                                                   | Pancreas       | In vitro: suppression of cancer cells growth, inhibition of colony formation, tube formation and angiogenesis, induction of apoptosis,<br>↓ Notch signaling, NF-κB signaling, phospho-STAT3, VEGF, IL-8, expression of cyclin D1, survivin and Bcl-xL genes<br>In vivo: reduction of volume and weight of tumors, inhibition of NF-κB signaling pathway                                                                                                                                                                           | [127-130]               |
|                                                                                   | Lungs          | In vitro: inhibition of cell proliferation, colony formation, migration and invasion, DNA fragmentation/damage, cell cycle arrest in G1, S and G2/M phase, induction of mitochondrial pathway of apoptosis, inhibition of TOPO I<br>↓ cyclin D1, Ras/Raf/MEK/Erk pathway, phospho-Erk1/2, p90RSK, pCREB, Fra1, phospho-TOPK, phospho-Akt, phospho-histone H3, ABCB1, ABCC1, ABCC2, ABCC3, MMP-2, MMP-9, VEGF, TGF-β, vimentin, N-cadherin, Snail                                                                                  | [170-175,177-180]       |

|                                                                                                  |          |                                                                                                                                                                                                                                                                                                                                                                                                                                                                                                                      |                 |
|--------------------------------------------------------------------------------------------------|----------|----------------------------------------------------------------------------------------------------------------------------------------------------------------------------------------------------------------------------------------------------------------------------------------------------------------------------------------------------------------------------------------------------------------------------------------------------------------------------------------------------------------------|-----------------|
|                                                                                                  |          | <p>↑ p53, p21, p27, PUMA, Bax, Bak, cytochrome c release, activation of caspase -3, -8, -9, TIMP-1, E-cadherin, <math>\alpha</math>-catenin</p> <p>In vivo: reduction of tumor weight and volume</p> <p>↓ Ki-67, cyclin D1, Fra1</p> <p>↑ PUMA</p>                                                                                                                                                                                                                                                                   |                 |
|                                                                                                  | Prostate | <p>In vitro: inhibition of cancer cells proliferation, migration and invasion, apoptotic (extrinsic and intrinsic) and autophagic cell death, S phase cell cycle arrest, mitochondrial damage, induction of oxidative stress</p> <p>↓ mitochondrial membrane potential, phospho-Akt, phospho-mTOR, NF-<math>\kappa</math>B signaling, Bcl-2, Bcl-xL, survivin</p> <p>↑ activation of caspase -3, -8, -9, PARP cleavage, cytochrome c release, Bid, Bax</p> <p>In vivo: reduction of progression and tumor growth</p> | [256-262,264]   |
|                                                                                                  | Skin     | <p>In vitro: inhibition of proliferation and colony formation and migratory activity</p> <p>↓ phospho-p38, phospho-JNK, phospho-Erk</p> <p>In vivo: inhibition of proliferation, decrease of number and size of metastases</p> <p>↓ MIA, Ki-67 positive cells</p>                                                                                                                                                                                                                                                    | [330,331,333]   |
| <p>Butein</p> 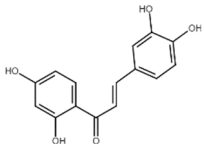 | Breast   | <p>In vitro: inhibition of cell proliferation and clonogenic growth, cell cycle arrest, aromatase inhibition</p> <p>↓ PMA-induced expression of COX-2, CXCR4, CXCL12-induced migration and invasion, phosphorylation of Erk, Bcl-2, ER-<math>\alpha</math> expression, ↑ p38 activity, caspase-3 and PARP cleavage, phospho-STAT3</p> <p>In vivo: inhibition of the growth of ER<math>\alpha</math>+ breast cancer cells, ↓ ROS, inhibition of Akt phosphorylation</p>                                               | [36-43]         |
|                                                                                                  | Liver    | <p>In vitro: cell proliferation suppression, G2/M cell cycle arrest, apoptosis induction, DNA damage response, inhibition of invasion and migration</p> <p>↓ MMP-2, MMP-7, MMP-9, uPA, Ras, Rho A, ROCK1, MEKK3, Erk1/2, JNK1/2, phospho-c-Jun, Akt/mTOR/p70S6K signaling pathway</p> <p>↑ phospho-Chk1, phospho-Chk2, ROS generation, DR5 receptor, phospho-p38</p> <p>In vivo: inhibition of tumor growth, ↓ Aurora B kinase, STAT3 signaling pathway</p>                                                          | [96,97,100-103] |
|                                                                                                  |          |                                                                                                                                                                                                                                                                                                                                                                                                                                                                                                                      |                 |
|                                                                                                  | Pancreas | In vitro: ↓ expression of CXCR4, NF- $\kappa$ B pathway                                                                                                                                                                                                                                                                                                                                                                                                                                                              | [37]            |

|  |             |                                                                                                                                                                                                                                                                                                                                                                                                                                                                                                                                                                                                                                                                                            |                          |
|--|-------------|--------------------------------------------------------------------------------------------------------------------------------------------------------------------------------------------------------------------------------------------------------------------------------------------------------------------------------------------------------------------------------------------------------------------------------------------------------------------------------------------------------------------------------------------------------------------------------------------------------------------------------------------------------------------------------------------|--------------------------|
|  | Oral cavity | In vitro: induction of apoptosis, inhibition of migration and invasion<br>↓ phospho-NF-κB/p65, COX-2, MMP-9, survivin                                                                                                                                                                                                                                                                                                                                                                                                                                                                                                                                                                      | [146]                    |
|  | Lungs       | In vitro: inhibition of cell proliferation, colony formation and migration, reduction of cell viability, G0/G1 and G2/M cell cycle arrest, DNA fragmentation, induction of mitochondrial and ER pathway of apoptosis<br>↓ cyclin D, cyclin B1, cdc25C, cdc2, MMP, Bcl-2, SOD2, GSH, phospho-EGFR, MET kinase activity, phospho-ERB3, phospho-Akt, phospho-Erk1/2, PD-L1, STAT1<br>↑ Bax, PUMA, activity of caspase -3, -8, -9, ROS generation, phospho-PERK, phospho-eIFα, ATF4, CHOP, IRE1α, XBP1, cleavage of PARP, phospho-p38<br>In vivo: inhibition of tumor growth, reduction of volume and weight of tumor, induction of ER stress, ROS generation<br>↓ Bcl-2, PD-L1<br>↑ CHOP, Bax | [43,184,185,187,188,190] |
|  | Prostate    | In vitro: inhibition of cell viability and proliferation, migration, invasion and angiogenesis<br>↓ cyclin D1, cyclin D2, cyclin E, Cdk2, Cdk4, Cdk6, Bcl-2, phospho-PI3K, phospho-Akt, IκB, NF-κB, VEGF, MMP-9<br>↑ p21, p27, activation of caspase -3, -8, -9, PARP cleavage, Bax<br>In vivo: inhibition of tumor growth<br>↓ Ki-67 positive cells, VEGF, CD31                                                                                                                                                                                                                                                                                                                           | [265,266]                |
|  | Bladder     | In vitro: antimigratory and antiinvasive activity, inhibition of EMT<br>↓ phospho-Erk1/2, NF-κB signaling pathway, vimentin<br>↑ E-cadherin                                                                                                                                                                                                                                                                                                                                                                                                                                                                                                                                                | [307]                    |

**Table S2.** Antiproliferative and anticancer effects of cardamonin and licochalcones based on *in vitro/in vivo* studies.

| Chalcones                                                                                           | Type of cancer | Mechanism of action/target or/and downstream effector                                                                                                                                                                                                                                                                                                                                                                                                                                                                                                                                                                                                                         | References            |
|-----------------------------------------------------------------------------------------------------|----------------|-------------------------------------------------------------------------------------------------------------------------------------------------------------------------------------------------------------------------------------------------------------------------------------------------------------------------------------------------------------------------------------------------------------------------------------------------------------------------------------------------------------------------------------------------------------------------------------------------------------------------------------------------------------------------------|-----------------------|
| <p>Cardamonin</p> 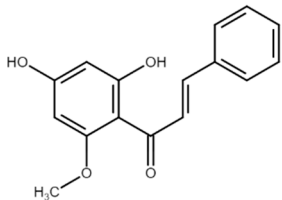 | Breast         | <p>In vitro: inhibition of proliferation, EMT transition, adhesion, migration, angiogenesis, induction of cell cycle arrest, DNA fragmentation and apoptosis<br/>           ↓ Bcl-2, N-cadherin, vimentin, <math>\beta</math>-catenin, Slug, Snail, HIF-1<math>\alpha</math>, cyclin D1, c-Myc, VEGF, Cdk-4, phospho-Akt, phospho-GSK-3<math>\beta</math>, phospho-S6K1, phospho-mTOR<br/>           ↑ Bax, cytochrome c, cleaved caspase -3, cleaved PARP, E-cadherin, ROS accumulation, PD-L1<br/>           In vivo: dose-dependent suppression of tumor volume, ↓ HIF-1<math>\alpha</math></p>                                                                            | [55,56,58-60]         |
|                                                                                                     | Liver          | <p>In vitro: induction of extrinsic and intrinsic apoptosis<br/>           ↓ NF-<math>\kappa</math>B pathway<br/>           ↑ ROS generation<br/>           In vivo: suppression of tumor growth, inhibition of NF-<math>\kappa</math>B pathway<br/>           ↓ PCNA, Ki-67, Bcl-2, NF-<math>\kappa</math>B/p65, Ikk<math>\beta</math><br/>           ↑ Bax</p>                                                                                                                                                                                                                                                                                                              | [104,105]             |
|                                                                                                     | Lungs          | <p>In vitro: inhibition of cell proliferation, colony formation, migration and invasion, cell cycle arrest v G2/M phase, DNA fragmentation, nuclear condensation, induction of apoptosis, mitochondrial damage, modulation of tumor microenvironment and EMT<br/>           ↓ cyclin D1, Cdk4, Bcl-2, N-cadherin, ZEB1, Snail, phospho-JNK, phospho-Akt, phospho-mTOR, S6K1<br/>           ↑ Bax, activation of caspase -3, cleaved PARP, ROS generation, E-cadherin, PP2A<br/>           In vivo: reduction in volume and size of tumors, reduction of number of metastatic nodules<br/>           ↓ phospho-Akt, phospho-mTOR, Ki-67, NF-<math>\kappa</math>B signaling</p> | [200-202,205,207,346] |
|                                                                                                     | Prostate       | <p>In vitro: induction of cell death, DNA fragmentation, inhibition of migration and invasion<br/>           ↓ NF-<math>\kappa</math>B, STAT3, JAK2, Bcl-xL, Bcl-2, survivin, XIAP, VEGF, COX2, MMP-9, cyclin D1, cyclin E, Cdk2, Cdk4</p>                                                                                                                                                                                                                                                                                                                                                                                                                                    | [272,273]             |

|                                                                                                                                                                                          |             |                                                                                                                                                                                                                                                                                                                                                                                                                                                                                                                                            |                                   |
|------------------------------------------------------------------------------------------------------------------------------------------------------------------------------------------|-------------|--------------------------------------------------------------------------------------------------------------------------------------------------------------------------------------------------------------------------------------------------------------------------------------------------------------------------------------------------------------------------------------------------------------------------------------------------------------------------------------------------------------------------------------------|-----------------------------------|
|                                                                                                                                                                                          |             | ↑ activation of caspase -3, -8, -9, PARP cleavage                                                                                                                                                                                                                                                                                                                                                                                                                                                                                          |                                   |
| <p>Licochalcones</p> 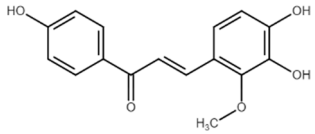  | Breast      | In vitro: inhibition of proliferation, invasion, migration and resistance, induction of DNA damage, autophagy and apoptosis, G2/M cell cycle arrest<br>↓ Bcl-2, cyclin D1, PI3K/Akt/mTOR pathway, PRMT6, MMP, AURKA, MDR-1, Sp-1, vimentin, phospho-Akt, phospho-JNK, phospho-p38, phospho-NF-κB, p62<br>↑ Bax, PARP cleavage, p53, cleaved caspase -3, -9, cytochrome c release, E-cadherin, Beclin-1, ATG5                                                                                                                               | [62,64-69,347]                    |
|                                                                                                                                                                                          | Liver       | In vitro: inhibition of migration, invasion, cell proliferation, induction of extrinsic and intrinsic apoptosis, G2/M cell cycle arrest<br>↓ uPA mRNA, uPA, Akt/mTOR pathway, mRNA of survivin, cyclin B1, Cdk1, Akt, p70S5K<br>↑ ROS generation, MAPK pathway, expression of DR4, DR5, mRNA of Wee1, p21, DR3, DR5, caspase -3, -8, -10, Fas, Bad, Bax, Bak, PUMA, FOXO signaling<br>In vivo: inhibition of HCC cell-mediated lung metastasis, prevention of (DEN)-induced DNA damage/fragmentation and antiapoptotic proteins expression | [106-113]                         |
|                                                                                                                                                                                          | Oral cavity | In vitro: induction of extrinsic and intrinsic apoptotic pathways, inhibition of migration<br>↓ Sp1, PI3K/Akt pathway, JAK/STAT pathway, survivin, cyclin D1, Bcl-2, Bcl-xL, matrin 3<br>↑ FasL, phospho-Erk, phospho-p38, p27, activation of caspase -3, -8, -9, PARP cleavage, DNA fragmentation, Bax, Bad, ROS production                                                                                                                                                                                                               | [137-145]                         |
|                                                                                                                                                                                          | Esophagus   | In vitro: induction of endoplasmic reticulum stress and apoptosis, ROS generation, cell cycle arrest in G1 and G2/M phase<br>↓ cyclin B1, cyclin D1, JAK2 kinase activity, phospho-STAT3, cdc2, Mcl-1, Bcl-2, mitochondrial cytochrome c<br>↑ p21, p27, MAPK pathway, phospho-JNK, phospho-c-Jun, phospho-p38, GRP78, CHOP, DR4, DR5, tBid, Bax, cytosolic cytochrome c, Apaf-1, cleaved PARP                                                                                                                                              | [150-152]                         |
|                                                                                                                                                                                          | Lungs       | In vitro: suppression of tumor cells proliferation, DNA damage, G1 and G2/M cell cycle arrest, mitochondrial and ER-mediated apoptotic pathway, induction of autophagy, ROS generation, inhibition of migration and invasion<br>↓ MMP, cyclin B1, cyclin D1, cdc2/Cdk1, Cdk2, Cdk4, cdc25C, MDM2, Bcl-2, Bcl-xL, Mcl-1, Nrf2, γ-GCSc, c-IAP1, c-IAP2, XIAP, c-FLIP <sub>L</sub> , PI3K/Akt/mTOR pathway, phospho-                                                                                                                          | [208-211,213-215,219,222,225,226] |

|  |          |                                                                                                                                                                                                                                                                                                                                                                                                                                                                                                  |           |
|--|----------|--------------------------------------------------------------------------------------------------------------------------------------------------------------------------------------------------------------------------------------------------------------------------------------------------------------------------------------------------------------------------------------------------------------------------------------------------------------------------------------------------|-----------|
|  |          | <p>JNK1, Wnt/<math>\beta</math>-catenin signaling, phospho-EGFR, phospho-c-Met, PD-L1, phospho-4EBP1, MMP-1, MMP-3, Sp1</p> <p>↑ Bax, Bad, Bid, cytochrome c release, Apaf-1, activation of caspase -3, -7, PARP cleavage, phospho-ATF4, phospho-PERK, eIF2, CHOP, BiP, ATG1, ATG3, ATG6, ATG16, LC3-I/II, miR-133-3p, phospho-p38, p21, p27, DR4, DR5</p> <p>In vivo: reduction of tumor volume and size</p> <p>↓ PI3K/Akt signaling, Ki-67, c-Met, phospho-EGFR, survivin</p>                  |           |
|  | Prostate | <p>In vitro: suppression of tumor cells growth, G1 and G2/M cell cycle arrest, induction of apoptosis, inhibition of migration</p> <p>↓ cyclin B1, cdc2, Rb</p>                                                                                                                                                                                                                                                                                                                                  | [274,275] |
|  | Bladder  | <p>In vitro: inhibition of cell proliferation, induction of mitochondrial dysfunction, ER-stress and apoptosis cell death, ROS generation, G1 and G2/M cell cycle arrest</p> <p>↑ activation of caspase -3, -9, Bax, Bim Apaf-1, cleavage of PARP</p> <p>↓ GSH, cyclin A, cyclin B1, Wee1, Cdk1, Cdk2, cdc25A, cdc25B, NF-<math>\kappa</math>B/p65, MMP-9, Bcl-2, Bcl-w, Bcl-xL</p> <p>In vivo: reduction of tumor size and weight, anti-migratory, anti-invasive and anti-adhesive activity</p> | [311-316] |
|  | Skin     | <p>In vitro: inhibition of cell proliferation, induction of apoptosis, inhibition of migration and invasion, ROS generation</p> <p>↓ MITF, mTOR signaling pathway, Bcl-2, mitochondrial membrane potential, p62, MM-2, MMP-9</p> <p>↑ activation of caspase -3, -9, Bax, LC3-I/II, Beclin-1, ATG1, ATG5</p> <p>In vivo: inhibition of tumor growth</p>                                                                                                                                           | [335,336] |

**Table S3.** Antiproliferative and anticancer effects of isoliquiritigenin, flavokawains and garcinol based on *in vitro/in vivo* studies.

| Chalcones                                                                         | Type of cancer | Mechanism of action/target or/and downstream effector                                                                                                                                                                                                                                                                                                                                                                                                                                                                                                                                                                                                                                                        | References                    |
|-----------------------------------------------------------------------------------|----------------|--------------------------------------------------------------------------------------------------------------------------------------------------------------------------------------------------------------------------------------------------------------------------------------------------------------------------------------------------------------------------------------------------------------------------------------------------------------------------------------------------------------------------------------------------------------------------------------------------------------------------------------------------------------------------------------------------------------|-------------------------------|
| 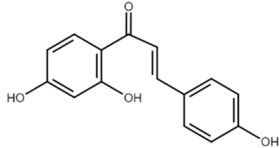 | Breast         | In vitro: antiproliferative, antiangiogenic, antimetastatic, antiinvasive activity, dual ER (estrogenic) agonist activity<br>↓ cell viability, BrdU incorporation, metabolism of arachidonic acid, PI3K/Akt signaling pathway, cell cycle regulating proteins, $\beta$ -catenin transcription activity, miR-374a, expression of Bcl-2, total and phosphorylated mTOR, VEGF-receptor, COX-2, RANKL/OPG ratio<br>↑ autophagy-mediated apoptosis, miR-200c, expression of PTEN, Bax, activation of caspase-3 and PARP, HIF-1 $\alpha$ degradation,<br>In vivo: ↓ c-Jun, ↑ miR-200c                                                                                                                              | [45-52]                       |
|                                                                                   | Oral cavity    | In vitro: downregulation of DNA repair mechanisms, induction of DNA damage and apoptosis, G2/M cell cycle arrest, inhibition of colony formation and invasion<br>↓ expression of ATM, ALDH1, CD44, ABCG2, GRP78                                                                                                                                                                                                                                                                                                                                                                                                                                                                                              | [147,148]                     |
|                                                                                   | Lungs          | In vitro: induction of extrinsic and intrinsic apoptotic cell death and necrosis, G0/G1 and G2/M cell cycle arrest, DNA fragmentation, mitochondrial damage, inhibition of EMT, invasion and migration<br>↓ Bcl-2, MDM2, phospho-EGFR, phospho-Akt, phospho-Erk1/2, cyclin D, PI3K/Akt signaling, mTOR, p70, Wnt/ $\beta$ -catenin pathway, $\beta$ -catenin nuclear translocation, N-cadherin, vimentin, phospho-FAK, phospho-cortactin<br>↑ Fas, mFasL, sFasL, p53, p21, Bax, Bim, cleaved caspase -3, -7, -8, -9, cleaved PARP, E-cadherin<br>In vivo: inhibition of tumor growth and size, reduction of number and size of metastatic lesions<br>↓ phospho-FAK, phospho-cortactin, Src signaling pathway | [191-195,197,198,300,348-350] |
|                                                                                   | Prostate       | In vitro: reduction of cell growth, G1 and G2/M cell cycle arrest, inhibition of migration, invasion, adhesion<br>↓ phospho-cdc2, MMP-9, uPA, TIMP-1, VEGF, integrin- $\alpha$ 2, ICAM, VCAM, phospho-Akt, phospho-JNK                                                                                                                                                                                                                                                                                                                                                                                                                                                                                       | [267,268,270,271]             |

|                                                                                                     |          |                                                                                                                                                                                                                                                                                                                                                                                                                                                                                                                                                                          |                   |
|-----------------------------------------------------------------------------------------------------|----------|--------------------------------------------------------------------------------------------------------------------------------------------------------------------------------------------------------------------------------------------------------------------------------------------------------------------------------------------------------------------------------------------------------------------------------------------------------------------------------------------------------------------------------------------------------------------------|-------------------|
|                                                                                                     |          | <p>↑ cdc25C, p38 MAPK signaling, Erk signaling,<br/>In vivo: reduction of tumor growth, volume and size, induction of apoptosis<br/>↓ Cdk1, cyclin B1<br/>↑ activation of caspase -3</p>                                                                                                                                                                                                                                                                                                                                                                                 |                   |
|                                                                                                     | Kidneys  | <p>In vitro: reduction of cell viability, inhibition of proliferation, migration and invasion, induction of apoptosis and autophagy, ROS generation<br/>↓ Bcl-2, Bcl-xL, STAT3 activity, cyclin D1, cyclin D2, PI3K/Akt/mTOR signaling pathway<br/>↑ activation of caspase -3, -7, -9, PARP cleavage, Bax, cytochrome c release<br/>In vivo: reduction the number of metastatic nodules</p>                                                                                                                                                                              | [298-300]         |
|                                                                                                     | Bladder  | <p>In vitro: induction of apoptosis, chromatin condensation, nuclear fragmentation, G1 phase cell cycle arrest, inhibition of migration, ROS generation<br/>↓ Bcl-2, mitochondrial membrane potential<br/>↑ Bim, Bax, Apaf-1, caspase -3, -9, cdc2</p>                                                                                                                                                                                                                                                                                                                   | [308-310]         |
|                                                                                                     | Skin     | <p>In vitro: inhibition of proliferation, migration and EMT, ROS generation, induction of apoptosis,<br/>↓ GLUT1/4, hexokinase 2, pyruvate kinase M2, LDH, mitochondrial membrane potential, HIF-1<math>\alpha</math>, miRNA27a, vimentin, miR-301b, miRNA-431-5p<br/>↑ E-cadherin</p>                                                                                                                                                                                                                                                                                   | [337-341]         |
| Flavokawains<br>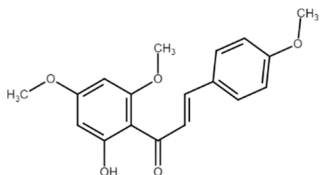 | Breast   | <p>In vitro: inhibition of cell proliferation, motility and invasiveness, colony formation, induction of apoptosis, cell cycle arrest in G1 and G2/M phase, immunomodulatory and anti-inflammatory effect<br/>↓ MMP, angiogenic activity, VEGF, CAM1, phospho-cdc2, phospho-Cdc25C, Myt1, Wee1, MPM-2, HER2, phospho-Akt, Bcl-2, Bcl-xL, survivin, XIAP<br/>↑ activation of caspase -8, -9, p27, Bax, Bim, cytochrome c, histone H1, cleaved PARP<br/>In vivo: ↓ tumor weight and volume<br/>↑ T cells, IFN-<math>\gamma</math>, IL-2 in serum, CD3, CD4, CD8, NK1.1</p> | [71-73]           |
|                                                                                                     | Lungs    | <p>In vitro: inhibition of tumor cell growth and proliferation, G2/M cell cycle arrest, ROS production, induction of apoptotic and autophagic cell death<br/>↓ Bcl-xL, XIAP, survivin, PI3K/Akt/mTOR signaling, P-gp<br/>↑ Bax, cytochrome c release, activation of caspase -3, -7, -9, cleavage of PARP, LC3-I/II, ATG4B, ATG7, JNK and p38 pathway</p>                                                                                                                                                                                                                 | [227,228,230,231] |
|                                                                                                     | Prostate | <p>In vitro: inhibition of cell proliferation, G2/M cell cycle arrest, induction of apoptosis<br/>↓ Skp2, Cdh1, survivin, tubulin polymerisation, glutamine metabolism, SGH</p>                                                                                                                                                                                                                                                                                                                                                                                          | [276-280]         |



|                                                                                                    |          |                                                                                                                                                                                                                                                                                                                                                                                                                                                                                                                                                                                          |                   |
|----------------------------------------------------------------------------------------------------|----------|------------------------------------------------------------------------------------------------------------------------------------------------------------------------------------------------------------------------------------------------------------------------------------------------------------------------------------------------------------------------------------------------------------------------------------------------------------------------------------------------------------------------------------------------------------------------------------------|-------------------|
|                                                                                                    |          | <p>↑ p27, ROS production<br/>In vivo: reduction of tumor growth<br/>↓ NANOG, OCT4, CD44, c-Myc, survivin, XIAP, Skp2<br/>↑ Bax, Bim, PUMA, DR5, p21, p27, caspase activation</p>                                                                                                                                                                                                                                                                                                                                                                                                         |                   |
|                                                                                                    | Bladder  | <p>In vitro: suppression of cell growth, intrinsic pathway of apoptosis, G1 and G2/M cell cycle arrest<br/>↓ Bcl-xL, mitochondrial membrane potential, Cdk2, Cdk1<br/>↑ activation of caspase -3, -9, Bax, cytochrome c release<br/>In vivo: induction of apoptosis, increase of survival<br/>↓ Ki-67 positive cells, PRMT5</p>                                                                                                                                                                                                                                                          | [318-320,323]     |
|                                                                                                    | Skin     | <p>In vitro: antiproliferative activity, induction of autophagy and apoptosis, AVO formation<br/>↓ Bcl-2, Akt/mTOR pathway, BRAF<br/>↑ activation of caspase -3, PARP cleavage, LC3-I/II, p62<br/>In vivo: reduction of tumor weight and volume</p>                                                                                                                                                                                                                                                                                                                                      | [334]             |
| <p>Garcinol</p> 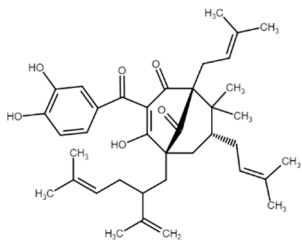 | Breast   | <p>In vitro: inhibition of proliferation, G0/G1 cell cycle arrest, induction of apoptosis, EMT and metastasis, inhibition of acetyltransferase<br/>↓ vimentin, acH3, NF-κB/ac-p65, NF-κB nuclear translocation, cyclin D1, Bcl-2, Bcl-xL, ZEB1, ZEB2, cytosolic and nuclear β-catenin<br/>↑ E-cadherin, miR-200, Iet-7 miRNAs</p>                                                                                                                                                                                                                                                        | [75-77]           |
|                                                                                                    | Pancreas | <p>In vitro: inhibition of cell proliferation and migration, induction of apoptosis<br/>↓ NF-κB, MMP-9, VEGF, IL-1, STAT3</p>                                                                                                                                                                                                                                                                                                                                                                                                                                                            | [131,132]         |
|                                                                                                    | Lungs    | <p>In vitro: G1 and S phase cell cycle arrest, reduction and viability, proliferation, self-renewal, multidrug resistance, EMT and DNA reparation<br/>↓ cyclin D1, cyclin D3, cyclin E, Cdk2, Cdk4, Cdk6, p38 MAPK pathway, c-FLIP, OCT4, BMI1, SOX2, NANOG, Notch1, ABCG2, c-Myc, phospho-STAT3, survivin, phospho-JAK1, phospho-JAK2, MAPK, Wnt/β-catenin signaling pathway, LRP6, β-catenin, Dvl2, Axin2, ALDH1A1, N-cadherin, vimentin<br/>↑ p21, p27, DR5, DDIT3, E-cadherin<br/>In vivo: reduction of size and weight of tumor<br/>↓ Ki-67 positive cells, ALDH1A1<br/>↑ DDIT3</p> | [232-234,236-238] |
|                                                                                                    | Prostate | <p>In vitro: inhibition of tumor cell proliferation, induction of apoptosis and autophagy, DNA fragmentation</p>                                                                                                                                                                                                                                                                                                                                                                                                                                                                         | [281,282]         |

|  |  |                                                                                                                                                                |  |
|--|--|----------------------------------------------------------------------------------------------------------------------------------------------------------------|--|
|  |  | ↓ mitochondrial membrane potential, Bcl-2, Erk1/2, NF-κB<br>↑ activation of caspase -3, -9, PARP cleavage, Bax LC3-I/II, phospho-mTOR, GSK-3β, PI3K, Akt, PDK1 |  |
|--|--|----------------------------------------------------------------------------------------------------------------------------------------------------------------|--|

## References

- 345 Gupta, K.K.; Sharma, K.K.; Chandra, H.; Panwar, H.; Bhardwaj, N.; Altwajry, N.A.; Alsouk, A.A.; Dlamini, Z.; Afzal, O.; Altamimi, A.S.A.; et al. The integrative bioinformatics approaches to predict the xanthohumol as anti-breast cancer molecule: Targeting cancer cells signaling PI3K and AKT kinase pathway. *Front. Oncol.* **2022**, *12*, 950835. <https://doi.org/10.3389/fonc.2022.950835>.
- 346 Makhija, P.; Handral, H.K.; Mahadevan, G.; Kathuria, H.; Sethi, G.; Grobber, B. Black cardamom (*Amomum subulatum* Roxb.) fruit extracts exhibit apoptotic activity against lung cancer cells. *J. Ethnopharmacol.* **2022**, *287*, 114953. <https://doi.org/10.1016/j.jep.2021.114953>.
- 347 Wahyuni, W.; Diantini, A.; Ghozali, M.; Subarnas, A.; Julaehe, E.; Amalia, R.; Sahidin, I. Cytotoxic and Antimigration Activity of Etlingera alba (A.D.) Poulsen Rhizome. *Adv. Pharmacol. Pharm. Sci.* **2021**, *2021*, 6597402. <https://doi.org/10.1155/2021/6597402>.
- 348 Cui, Y.; Wu, Y.; Wang, C.; Wang, Z.; Li, Y.; Jiang, Z.; Zhao, W.; Pan, Z. Isoliquiritigenin inhibits non-small cell lung cancer progression via m6A/IGF2BP3-dependent TWIST1 mRNA stabilization. *Phytomed. Int. J. Phytother. Phytopharm.* **2022**, *104*, 154299. <https://doi.org/10.1016/j.phymed.2022.154299>.
- 349 Han, C.; Kawata, M.; Hamada, Y.; Kondo, T.; Wada, J.; Asano, K.; Makabe, H.; Igarashi, K.; Kuzumaki, N.; Narita, M.; et al. Analyses of the possible anti-tumor effect of yokukansan. *J. Nat. Med.* **2019**, *73*, 468–479. <https://doi.org/10.1007/s11418-019-01283-x>.
- 350 Zhou, Y.; Ho, W.S. Combination of liquiritin, isoliquiritin and isoliquiritigenin induce apoptotic cell death through upregulating p53 and p21 in the A549 non-small cell lung cancer cells. *Oncol. Rep.* **2014**, *31*, 298–304. <https://doi.org/10.3892/or.2013.2849>.
